# Supplementary material
Source: HighWire-hosted journal article supplement (https://www.genetics.org/content/suppl/2010/07/13/genetics.110.118596)
Supplement: FigureS3.pdf [file FigureS3.pdf]

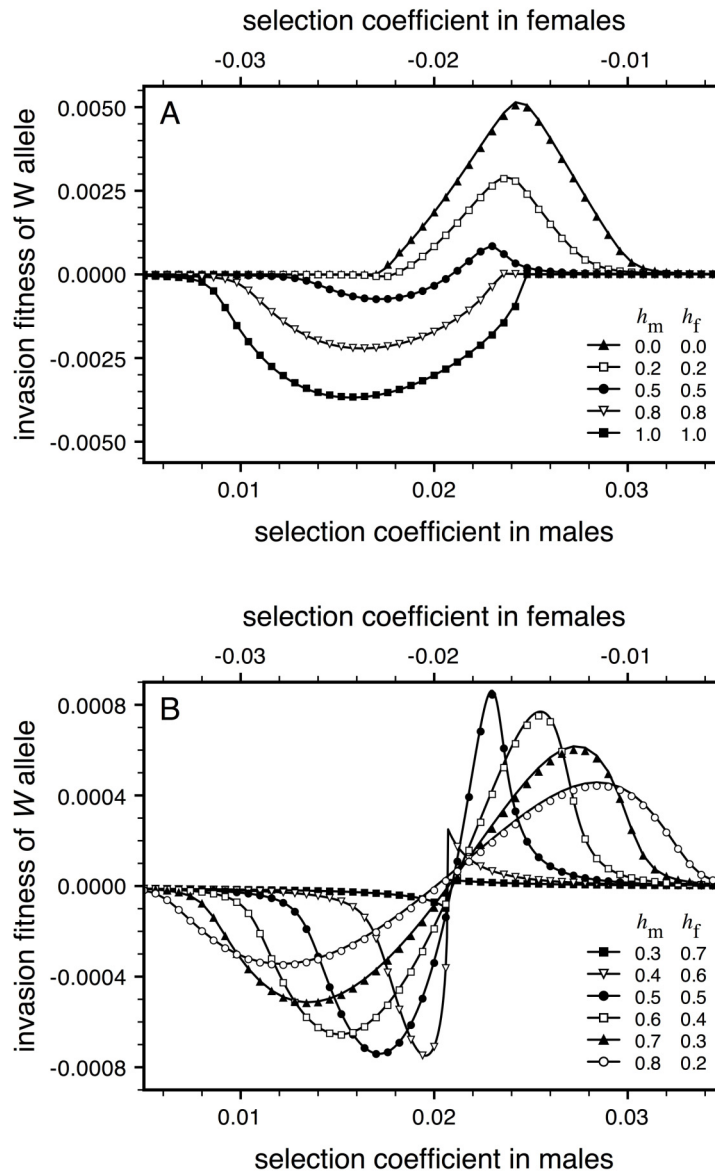

FIGURE S3. – Homologous transitions depend on the details of sex-antagonistic selection. The two panels show analytical invasion-fitness estimates for homologous transitions (solid curves) and numerical results based on the exact population genetic recursions (symbols) across a range of sex-antagonistic selection coefficients and for different combinations of dominance parameters. Overall, higher male-beneficial allele frequencies (right on the horizontal axes) favor homologous transitions to  $\mathcal{Z}W$  sex-determination, since female heterogamety allows rare female-beneficial alleles to accumulate on the w-chromosome without being exposed to selection in males. (A) A feminizing mutation at the ancestral sex-determination locus is more likely to spread, if male-beneficial alleles at nearby loci are recessive and female-beneficial alleles are dominant, since this increases the expression of favorable effects in both the homogametic and heterogametic sex. (B) Sex-specific differences in the dominance coefficients influence the scope for the maintenance of variation at sex-antagonistic loci. Stronger support of sex-antagonistic variation by sex-specific dominance ( $h_m > h_f$ ) allows for heterogamety transitions over a wider range of selection coefficients, but is also associated with a smaller changes in sex-antagonistic allele frequencies during a heterogamety transition, reducing the maximal strength of indirect selection on the  $W$  allele. Other parameters:  $r = r' = 0.01$ ,  $\bar{\mu} = \bar{\mu} = 1.0 \cdot 10^{-5}$ .
